# Supplementary material
Source: Springer Nature journal article supplement (https://www.springermedizin.de/resource/supplementary/12888_2010_766_MOESM3_ESM.pdf/9478670)

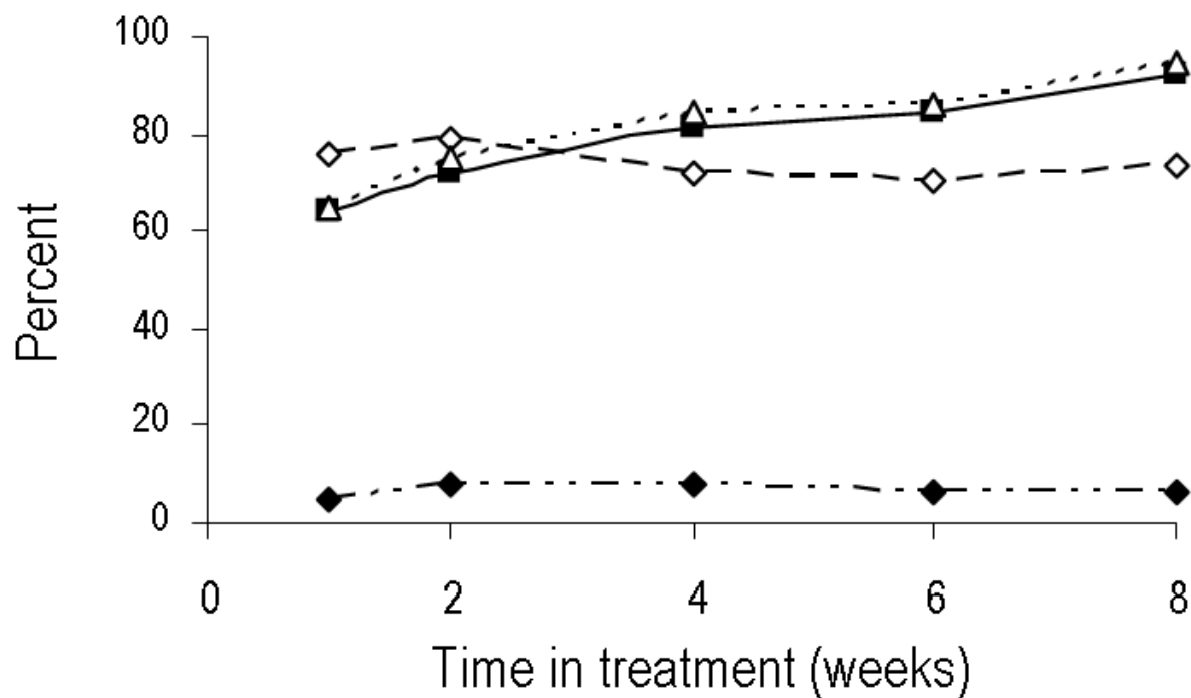

—◇— PPV

—■— NPV (1-level Tree)

—◆— Not Predictable

—△— NPV (2-level Tree)

Supplement: MOESM3 [file 9478670]
